# Supplementary material
Source: MDPI journal article supplement (https://www.mdpi.com/2297-8739/8/9/131)
Supplement: s1 [file s1]

Table S1. Standards and chemicals used for GC-MS

| Standard                  | Specification                         | Brand                                           |
|---------------------------|---------------------------------------|-------------------------------------------------|
| (-)-Menthol               | GC grade                              | Carl Roth GmbH + Co. KG, Karlsruhe, Germany     |
| (-)-( $\alpha$ )-Pinene   | GC grade                              | Carl Roth GmbH + Co. KG, Karlsruhe, Germany     |
| (-)- $\beta$ -Pinene      | GC grade                              | Carl Roth GmbH + Co. KG, Karlsruhe, Germany     |
| (+)-carvone               | GC grade                              | Carl Roth GmbH + Co. KG, Karlsruhe, Germany     |
| (R)-(+)-Limonene          | Analytical standard                   | Fluka, Buchs, Switzerland                       |
| (Z)- $\beta$ -Damascenone | GC-MS grade                           | Sigma-Aldrich Chemie GmbH, Taufkirchen, Germany |
| 6-Methyl-5-hepten-2-one   | 99%                                   | Sigma-Aldrich Chemie GmbH, Taufkirchen, Germany |
| Anethole                  | GC grade                              | Fluka, Buchs, Switzerland                       |
| Benzaldehyde              | $\geq 99\%$                           | Sigma-Aldrich Chemie GmbH, Taufkirchen, Germany |
| Camphene                  | GC grade                              | Carl Roth GmbH + Co. KG, Karlsruhe, Germany     |
| Carvacrol                 | $> 97\%$                              | Carl Roth GmbH + Co. KG, Karlsruhe, Germany     |
| Carvone                   | GC grade                              | Carl Roth GmbH + Co. KG, Karlsruhe, Germany     |
| Decanal <n>               | Analytical standard                   | Sigma-Aldrich Chemie GmbH, Taufkirchen, Germany |
| DL-camphor                | GC grade                              | Carl Roth GmbH + Co. KG, Karlsruhe, Germany     |
| DL- $\alpha$ -Pinene      | GC grade                              | Carl Roth GmbH + Co. KG, Karlsruhe, Germany     |
| Estragole                 | 98%                                   | Sigma-Aldrich Chemie GmbH, Taufkirchen, Germany |
| Ethanol                   | Absolute                              | Merck KGaA, Darmstadt, Germany                  |
| Eucalyptol                | GC grade                              | Carl Roth GmbH + Co. KG, Karlsruhe, Germany     |
| Farnesene                 | Mixture of isomers                    | Sigma-Aldrich Chemie GmbH, Taufkirchen, Germany |
| Fenchone                  | GC grade                              | Fluka, Buchs, Switzerland                       |
| Hexanal                   | 98%                                   | Sigma-Aldrich Chemie GmbH, Taufkirchen, Germany |
| Isoborneol                | GC grade                              | Carl Roth GmbH + Co. KG, Karlsruhe, Germany     |
| iso-Menthol               | GC grade                              | Carl Roth GmbH + Co. KG, Karlsruhe, Germany     |
| Linalool                  | GC grade                              | Carl Roth GmbH + Co. KG, Karlsruhe, Germany     |
| Menthone                  | GC grade                              | Carl Roth GmbH + Co. KG, Karlsruhe, Germany     |
| Nerol                     | GC grade                              | Carl Roth GmbH + Co. KG, Karlsruhe, Germany     |
| Ocimene                   | Isomers mix, $\geq 90\%$ , stabilized | Sigma-Aldrich Chemie GmbH, Taufkirchen, Germany |
| Palmitic acid             | 99%                                   | Sigma-Aldrich Chemie GmbH, Taufkirchen, Germany |
| p-Cymene                  | GC grade                              | Carl Roth GmbH + Co. KG, Karlsruhe, Germany     |
| Squalene                  | 98%                                   | Sigma-Aldrich Chemie GmbH, Taufkirchen, Germany |
| Terpinen-4-ol             | 94%                                   | Carl Roth GmbH + Co. KG, Karlsruhe, Germany     |
| trans- $\beta$ -Ionone    | GC-MS grade                           | Sigma-Aldrich Chemie GmbH, Taufkirchen, Germany |
| $\alpha$ -Terpineol       | GC grade                              | Carl Roth GmbH + Co. KG, Karlsruhe, Germany     |
| $\beta$ -Caryophyllene    | GC grade                              | Carl Roth GmbH + Co. KG, Karlsruhe, Germany     |
| $\beta$ -Myrcene          | $\geq 90\%$                           | Carl Roth GmbH + Co. KG, Karlsruhe, Germany     |
| $\gamma$ -Terpinene       | GC grade                              | Carl Roth GmbH + Co. KG, Karlsruhe, Germany     |

Table S2. Relative peak areas of the compounds obtained by hydrodistillation and SPDE

| Compound                    | Hydrodistillation |          | Single infusions<br>(SI) |          | Traditional consecutive<br>infusions<br>(TCI) |          |
|-----------------------------|-------------------|----------|--------------------------|----------|-----------------------------------------------|----------|
|                             | A                 | B        | A                        | B        | A                                             | B        |
|                             | (% area)          | (% area) | (% area)                 | (% area) | (% area)                                      | (% area) |
| Hexanal                     | -                 | -        | 7.89                     | 6.69     | 7.23                                          | 6.37     |
| Oxime-metoxo-phenyl         | -                 | -        | 11.32                    | 10.81    | 9.58                                          | 10.09    |
| Pinene < $\alpha$ ->        | -                 | -        | 2.57                     | 1.76     | 3.07                                          | 2.07     |
| Camphene                    | -                 | -        | 0.06                     | 0.05     | 0.06                                          | 0.05     |
| Benzaldehyde                | 0.14              | 0.13     | 1.03                     | 2.39     | 1.09                                          | 1.93     |
| Pinene < $\beta$ ->         | -                 | -        | 4.37                     | 5.85     | 3.96                                          | 5.71     |
| 5-Hepten-2-one <6-methyl-5> | 0.2               | 0.19     | 1.23                     | 1.74     | 0.97                                          | 1.47     |
| Myrcene <( $\beta$ )->      | -                 | -        | 0.81                     | 0.92     | 0.72                                          | 0.95     |
| Pentyl furan <2->           | -                 | -        | 0.74                     | 0.88     | 0.66                                          | 0.84     |
| Heptadienal <(2E,4Z)->      | 0.19              | 0.14     | -                        | -        | -                                             | -        |
| Octanal                     | -                 | -        | 2.13                     | 2.15     | 2.43                                          | 2.29     |
| Heptadienal <(2E,4E)->      | 0.83              | 0.71     | 1.98                     | 2.24     | 1.86                                          | 2.28     |
| Cymene <p->                 | 0.03              | 0.01     | 12.19                    | 6.98     | 9.85                                          | 5.9      |
| Limonene                    | 0.18              | 0.11     | 15.36                    | 21.85    | 16.85                                         | 17.53    |
| Eucalyptol                  | 0.34              | 0.23     | 8.18                     | 6.06     | 10.46                                         | 8.76     |
| Ocimene <(E)- $\beta$ ->    | 0.26              | 0.21     | 0.91                     | 1.06     | 1.1                                           | 1.4      |
| 2-octenal <(E)->            | 0.12              | 0.09     | -                        | -        | -                                             | -        |
| Terpinene < $\gamma$ ->     | -                 | -        | 1                        | 0.89     | 1.05                                          | 1.32     |
| Octadien-2-one <(3E,5E)->   | 0.16              | 0.36     | -                        | -        | -                                             | -        |
| Linalooloxide <(Z)->        | 0.38              | 0.14     | -                        | -        | -                                             | -        |
| Linalooloxide <(E)->        | 0.44              | 0.36     | -                        | -        | -                                             | -        |
| Fenchone                    | -                 | -        | 0.05                     | 0.03     | 0.06                                          | 0.05     |
| Linalool                    | 18.62             | 17.57    | 9.42                     | 8.56     | 11.86                                         | 12.17    |
| Unknown                     | -                 | -        | 3.1                      | 2.95     | 2.24                                          | 2.52     |
| Perillene (?)               | -                 | -        | 0.16                     | 0.1      | 0.15                                          | 0.09     |
| Pinocarveol <trans->        | 0.31              | 0.29     | -                        | -        | -                                             | -        |
| Verbenol <trans->           | 0.06              | 0.07     | -                        | -        | -                                             | -        |
| Camphor                     | Trace             | Trace    | -                        | -        | -                                             | -        |
| Nonadienal <(2E,6Z)->       | 0.11              | 0.12     | -                        | -        | -                                             | -        |
| Menthone                    | 0.06              | 0.05     | -                        | -        | -                                             | -        |
| Isoborneol                  | -                 | -        | 3.28                     | 4.06     | 2.79                                          | 3.64     |
| Menthol                     | -                 | -        | Trace                    | Trace    | Trace                                         | Trace    |
| Menthol <iso->              | 0.06              | 0.07     | -                        | -        | -                                             | -        |

|                                                                  |      |      |      |      |      |      |
|------------------------------------------------------------------|------|------|------|------|------|------|
| Terpinen-4-ol                                                    | 0.12 | 0.12 | -    | -    | -    | -    |
| Naphtalene                                                       | 0.09 | 0.07 | -    | -    | -    | -    |
| MethylSalicylate                                                 | 0.15 | 0.13 | -    | -    | -    | -    |
| Estragole                                                        | -    | -    | 1.85 | 0.82 | 1.56 | 0.73 |
| Terpineol <α->                                                   | 3.29 | 3.59 | -    | -    | -    | -    |
| Safranal                                                         | 0.13 | 0.06 | -    | -    | -    | -    |
| Decanal <n>                                                      | 0.19 | 0.17 | 2.24 | 2.07 | 1.97 | 1.94 |
| Cyclocitral <β->                                                 | 0.61 | 0.63 | 1.37 | 1.75 | 1.4  | 1.53 |
| Nerol                                                            | 1.19 | 1.34 | -    | -    | -    | -    |
| 166;136;120;108;93;86;79;69                                      | 0.15 | 0.16 | -    | -    | -    | -    |
| Carvone                                                          | 0.13 | 0.13 | -    | -    | -    | -    |
| Geraniol                                                         | 3.05 | 3.29 | -    | -    | -    | -    |
| Ionene, <α->                                                     | 0.35 | 0.18 | -    | -    | -    | -    |
| 2-Decenal <(E)- >                                                | 0.35 | 0.36 | -    | -    | -    | -    |
| 1H-2-Indenone,2,4,5,6,7,7a-hexahydro-3-(1-methylethyl)-7a-methyl | 0.41 | 0.35 | 1.96 | 1.51 | 1.73 | 1.43 |
| Anethole <(E)->                                                  | 0.08 | 0.08 | 0.99 | 1.04 | 1.04 | 1.2  |
| Safrole                                                          | 0    | 0.07 |      |      |      |      |
| Carvacrol                                                        | -    | -    | 0.21 | 0.25 | 0.21 | 0.29 |
| Edulan I <dihydro-> (?)                                          | 0.3  | 0.29 | -    | -    | -    | -    |
| 172;157;142;128;115;91;77;69;57                                  | 0.28 | 0.53 | -    | -    | -    | -    |
| Undecenal <(2E)-> (?)                                            | 0.31 | 0.27 | -    | -    | -    | -    |
| Copaene <α->                                                     | 0.54 | 0.56 | -    | -    | -    | -    |
| Damascenone <(Z)-β->                                             | 3.23 | 3.14 | 0.5  | 0.65 | 0.6  | 0.73 |
| 192;147;144;131;119;105;93;91;79;69;55                           | 0.53 | 0.59 | -    | -    | -    | -    |
| Elemene <β->                                                     | 0.84 | 0.75 | -    | -    | -    | -    |
| Damascone <(E)-β->                                               | 0.81 | 0.46 | -    | -    | -    | -    |
| 192;174;159;144;131;119;105;91;82;77;71                          | 0    | 0.3  | -    | -    | -    | -    |
| Caryophyllene <(E)-β->                                           | 0.67 | 0.7  | -    | -    | -    | -    |
| Ionone <(E)-α->                                                  | 0.44 | 0.47 | -    | -    | -    | -    |
| Merged peaks                                                     | 0.33 | 0.3  | -    | -    | -    | -    |
| Aromadendrene                                                    | 0.49 | 0.38 | -    | -    | -    | -    |
| Geranylacetone <(E)->                                            | 1.2  | 1.26 | 2.06 | 2.56 | 2.25 | 3.1  |
| 204;178;163;161;150;135;121;107;91;79;71                         | 0.89 | 0.98 | -    | -    | -    | -    |
| Muurolene <γ->                                                   | 0.4  | 0.48 | -    | -    | -    | -    |
| Ionone <(E)-β->                                                  | 1.12 | 1.03 | 1.13 | 1.36 | 1.28 | 1.71 |
| Muurola-4(14),5-diene <trans->                                   | 0.98 | 1.02 | -    | -    | -    | -    |
| Unknown                                                          | 0.81 | 0.92 | -    | -    | -    | -    |

|                                                                    |       |       |   |   |   |   |
|--------------------------------------------------------------------|-------|-------|---|---|---|---|
| Bicyclogermacrene (?)                                              | 1.21  | 1.08  | - | - | - | - |
| Farnesene <α->                                                     | 10.71 | 10.32 | - | - | - | - |
| Cadinene <γ->                                                      | 0.84  | 0.81  | - | - | - | - |
| Unknown                                                            | 0     | 0.32  | - | - | - | - |
| Nerolidol <(E)->                                                   | 2.07  | 2.12  | - | - | - | - |
| Dendrolasin                                                        | 1.47  | 1.37  | - | - | - | - |
| Spathulenol                                                        | 0.97  | 0.82  | - | - | - | - |
| Caryophyllene oxide                                                | 0.44  | 0.55  | - | - | - | - |
| Merged peaks                                                       | 0.5   | 0.42  | - | - | - | - |
| Guaiol                                                             | 0.44  | 0.39  | - | - | - | - |
| Hexadecane <n->                                                    | 0.27  | 0.25  | - | - | - | - |
| Merged peaks                                                       | 0.28  | 0.32  | - | - | - | - |
| Merged peaks                                                       | 0.26  | 0.15  | - | - | - | - |
| Cadinol <α->                                                       | 0.33  | 0.43  | - | - | - | - |
| 6,9-Heptadecadiene (?)                                             | 1.04  | 1.1   | - | - | - | - |
| Unknown                                                            | 0.58  | 0.66  | - | - | - | - |
| 3-Heptadecene <(Z)-> (?)                                           | 2.6   | 2.57  | - | - | - | - |
| 236;258;189;161;145;133;123;119;109;95;81;69;67;57                 | 0.22  | 0.43  | - | - | - | - |
| Pentadecanone <2->                                                 | 0.18  | 0     | - | - | - | - |
| Merged peaks                                                       | 0.26  | 0.3   | - | - | - | - |
| Tetradecanoic acid                                                 | 1.31  | 1.75  | - | - | - | - |
| 122;196;166;138;123;109;96;82;69;57                                | 0.19  | 0.21  | - | - | - | - |
| 278;263;249;236;222;208;193;179;165;151;137;123;109;95;82;71;68;57 | 1.21  | 1.41  | - | - | - | - |
| Hexahydrofarnesylacetone                                           | 1.39  | 1.82  | - | - | - | - |
| 278;263;249;236;222;208;193;179;165;151;137;123;109;95;82;71;68;57 | 0.8   | 0.3   | - | - | - | - |
| Farnesylacetone <(5E,9E)->                                         | 0.36  | 0.45  | - | - | - | - |
| Methyl hexadecanoate                                               | 2.32  | 1.62  | - | - | - | - |
| Isophytol(?)                                                       | 0.36  | 0.4   | - | - | - | - |
| Palmitic acid                                                      | 4.2   | 4.86  | - | - | - | - |
| 272;257;229;215;203;189;175;161;147;136;121;107;93;81;69           | 0.57  | 0.62  | - | - | - | - |
| Methyl linolenate                                                  | 2.2   | 0.78  | - | - | - | - |
| 296;264;236;222;180;166;152;137;123;110;96;83;74                   | 0     | 0.85  | - | - | - | - |
| Phytol                                                             | 4.14  | 4.86  | - | - | - | - |
| Merged peaks                                                       | 1.01  | 0.92  | - | - | - | - |
| Merged peaks                                                       | 0     | 0.65  | - | - | - | - |
| 9-Tricosene <(Z)->                                                 | 0.07  | 0.08  | - | - | - | - |

|                                                                   |      |      |   |   |   |   |
|-------------------------------------------------------------------|------|------|---|---|---|---|
| Tricosane                                                         | 0.26 | 0.29 | - | - | - | - |
| 242;299;273;257;231;217;203;191;185;161;149;136;121;1007;95;81;69 | 0.21 | 0.28 | - | - | - | - |
| Squalene                                                          | 7.19 | 6.04 | - | - | - | - |

'(?)' – low MS library search matches and/or imprecise retention index match.
